# Supplementary material for: Molecular Mapping and QTL for Expression Profiles of Flavonoid Genes in Brassica napus
Source: Front Plant Sci. 2016 Nov 9;7:1691. doi: 10.3389/fpls.2016.01691 (PMC5102069; doi:10.3389/fpls.2016.01691)
Supplement: Supplementary file 7 [file Table7.XLSX]

## Sheet: Supplementary Table S7
Supplementary Table S7 the average of ct values of qRT-PCR in this study
No. of RILs	AHA10	Actin	TT7	Actin	TT1	Actin	TT2	Actin	TT3	Actin	TT4	Actin	TT5	Actin	TT6	Actin	TT8	Actin
	ct average
302	24.69	21.25	30.97	21.37	28.91	21.29	23.46	20.95	22.03	21.31	20.86	21.17	23.44	20.97	22.95	20.9	26.09	20.98
304	24.89	21.69	30.59	21.56	29.04	21.44	23.72	21.4	23.59	21.8	22.1	21.79	24.15	21.87	23.33	21.55	27.05	21.62
305	24.89	21.83	31.34	21.8	28.96	21.34	23.45	21.62	22.83	21.68	21.49	21.66	23.59	21.61	23.06	21.59	26.75	21.42
306	24.97	21.79	29.74	21.66	29.28	21.23	23.72	21.41	22.29	21.61	20.84	21.55	23.06	21.31	23.01	21.5	26.47	21.33
307	24.67	21.57	30.79	21.54	29.08	21.68	23.55	21.86	23.38	22.18	22.13	22.51	24.25	22.43	22.94	21.96	27.2	21.76
308	25.59	21.85	33.15	22.28	27.29	21.27	24.19	21.05	21.51	21.07	18.53	20.95	22.35	21.03	21.09	20.8	25.59	21.2
309	25.07	21.87	31.58	23.58	27.52	21.61	23.87	21.37	21.69	21.72	18.55	21.98	22.47	21.68	21.27	21.51	25.46	21.52
310	24.75	21.82	31.85	22.01	27.47	20.71	21.81	20.95	22.11	21.11	19.42	21.13	21.92	20.9	21.51	20.86	25.74	21.21
311	24.16	22.18	32.58	22.3	27.29	21.15	24.22	21.79	21.14	21.7	18.81	21.75	22.56	21.93	20.89	21.91	25.73	21.5
312	24.64	22.4	31.34	22.58	28.28	21.62	24.63	22	22.34	22.5	19.84	22.81	23.41	22.62	22.16	22.31	26.59	22.45
317	24.23	21.41	29.56	21.51	29.33	21.5	23.94	21.64	22.87	21.79	21.44	21.66	23.32	21.99	23.59	21.81	26.49	21.84
319	25.59	21.64	30.26	21.83	29.52	21.71	24.76	21.93	24.34	22.01	22.76	22.31	24.95	22.2	24.29	22.36	27.65	21.95
320	24.38	21.97	29.25	22.02	29.24	22.19	23.8	22.06	23.64	22.57	21.57	22.65	24.54	21.82	23.62	22.41	26.58	22.12
321	25.68	22.28	31.08	22.53	29.49	21.74	23.73	21.55	23.77	21.55	22.74	21.82	23.78	21.72	24.09	21.39	26.66	21.53
323	24.67	21.72	30.13	21.69	28.92	21.3	24.21	21.69	23.02	21.89	21.4	21.75	23.1	21.47	23.12	21.7	26.77	21.57
337	24.4	21.75	30.99	21.86	28.05	21.9	25.18	21.99	21.77	22.27	19.28	22.31	22.91	21.82	21.49	22.1	26.02	22.19
338	24.03	21.72	32.35	21.67	27.57	21.01	23.65	21.25	22.52	21.76	19.85	21.92	22.66	21.47	21.4	21.33	26.45	21.54
339	23.95	21.54	34.53	21.49	29.26	22.43	24.83	22.42	23.68	22.43	21.43	22.55	23.53	22.66	22.71	22.37	27.43	22.44
341	25.32	22.25	30.05	22.7	29.77	22.14	25.89	22.76	24.76	23.27	22.71	23.05	24.57	23.27	24.28	23.02	27.58	22.94
343	23.78	21.47	30.92	21.76	28.49	21.88	25.29	22.21	22.11	22.09	18.87	22.19	22.71	21.94	21.24	22.14	26.64	22
346	24.73	21.96	29.58	22.11	29.08	21.36	25.17	21.92	23.44	22.43	21.86	21.87	23.43	21.95	23.68	22.13	26.45	22.44
348	24.41	21.36	30.16	21.36	29.66	21.39	24.84	21.68	22.83	21.96	21.8	21.99	23.31	21.89	23.3	22.05	26.39	21.96
349	24.89	21.48	30.38	21.48	28.63	20.99	24.81	21.95	23.97	21.97	22.31	22.91	23.88	22.04	23.94	21.94	26.98	21.74
350	25.01	22.38	31.45	22.6	28.27	21.57	26	22.42	23.28	22.94	20.7	23.38	23.8	22.93	22.12	22.64	27.77	22.97
358	23.74	21.61	29.3	21.67	28.09	21.48	22.2	23.07	22.62	21.91	19.58	22.41	23.76	22.03	22.3	22.77	26.73	22.09
359	24.65	21.15	31.07	22.52	28.16	22.48	25.7	22.82	23.18	23.17	20.22	23.26	24.97	22.8	22.7	23.32	27.25	23.44
360	24.15	21.73	29.99	21.73	28.33	21.71	23.48	21.8	23.24	21.69	21	27.12	23.52	21.71	22.8	22.1	26.54	21.75
361	24.93	22.31	30.67	21.97	28.66	22.05	25.64	22.73	22.95	22.63	20.25	22.82	24.14	22.78	22.09	22.68	27.02	22.72
362	23.46	21.82	29.48	21.48	28.38	21.72	24.36	21.81	22.3	21.65	19.2	21.72	23.57	22.07	21.45	21.69	26.45	21.96
368	24.28	21.73	28.86	21.21	28.64	21.76	25.36	21.56	22.75	21.82	20.13	22.2	24.29	21.86	22.48	21.8	26.97	21.62
371	23.65	21.42	30.11	21.62	27.71	21.5	22.47	22.68	22.16	22.33	18.89	21.88	24.06	22.05	21.02	21.6	25.69	21.46
372	24.8	22.03	29.87	22.08	29.84	22.09	25.09	21.98	23.13	21.69	21.57	21.79	23.39	22.04	23.49	21.44	26.01	21.53
373	24.96	21.38	28.87	21.52	30.1	21.68	25.28	21.88	24.61	21.8	22.71	22.14	25.44	22.2	24.58	22.22	27.68	21.87
375	24.23	22.2	31.37	22.31	28.61	22.2	24.87	22.23	22.69	22.48	19.58	22.7	23.76	22.28	21.85	22.44	26.87	22.54
376	23.84	21.71	31.03	21.68	28.06	22.08	25.16	22.03	22.58	23.45	18.72	22.48	22.99	22.18	20.94	22.32	25.64	21.84
377	24.7	21.72	28.73	21.39	28.79	21.7	25.84	22.1	22.86	22.42	20.1	22.25	24.04	22.02	22.03	21.92	26.61	21.98
379	24.58	21.73	28.53	21.82	29.18	21.91	22.48	22.51	23.72	21.96	21.37	21.93	24.08	21.65	23.9	21.83	25.61	21.43
380	25.01	21.26	28.97	21.12	29.17	21.33	24.79	20.96	23.47	21.42	21.39	21.4	24.02	21.36	23.03	21.12	26.19	21.29
381	24.77	21.25	30.07	20.82	28.83	21.54	24.63	21.27	22.11	21.21	19.6	21.99	24.54	22.03	21.22	21.3	26.63	21.5
382	24.87	21.95	28.86	21.68	29.62	22.38	25.47	22.73	23.6	22.3	21.88	22.45	24.79	22.34	23.89	22.48	27.47	22.37
383	24.9	21.61	30.02	21.41	29.48	21.53	24.65	21.65	23.24	21.44	21.88	21.43	24.4	21.71	23.74	21.55	26.42	21.13
384	25.49	21.45	29.91	21.36	30.08	21.52	25.52	21.19	23.31	21.42	22.02	21.56	24.79	21.55	24.38	21.63	26.76	21.2
389	25.18	22.31	29.54	21.77	28.71	20.92	22.72	22.5	23.34	21.6	21.59	21.67	24.81	21.81	23.58	21.56	27.03	21.64
393	24.35	21.24	29.31	21.2	28.62	21.07	22.98	20.62	22.78	21.13	21.91	21.24	23.89	20.93	23.73	21.2	25.95	20.87
395	24.1	21.8	28.21	21.86	28.59	22.19	23.26	21.71	22.69	21.69	20.83	22.52	24.21	22.07	22.77	21.89	25.5	21.53
401	24.12	22.25	30.82	21.82	27.79	22.09	23.76	21.38	21.73	21.13	18.82	21.94	23.28	21.81	20.61	21.89	25.83	21.5
402	24.33	21.36	29.03	21.33	28.19	22.02	24.36	22.08	22.33	21.89	19.45	22.15	24.47	21.86	21.26	21.71	25.96	21.81
403	23.86	21.88	28.73	21.47	28.05	22.45	24.64	22.01	22.28	21.79	19.58	22.1	24.23	21.96	21.86	22	25.97	21.7
407	22.94	21.38	30.18	21.11	28.46	22.31	23.88	21.57	22.54	21.7	19.34	21.6	22.6	22.07	21.53	21.83	25.87	21.16
413	24.11	20.91	29.29	21.02	28.76	21.29	23.22	20.78	21.81	20.79	19.02	20.9	22.55	21	21.64	21.04	25.66	21.31
414	24.12	21.84	30.58	21.81	28.51	22.62	25.27	22.85	22.62	22.01	18.86	21.95	23.78	22.98	21.67	22.37	24.91	21.89
415	23.47	21.44	30.1	21.39	27.84	21.95	24.03	21.69	21.46	21.15	18.44	21.24	23.07	22.09	20.98	21.33	25.19	21.87
418	23.64	21.32	30.99	21.14	27.65	21.19	23.82	21.01	21.39	21.09	18.07	20.92	21.76	21.13	20.94	21.08	24.84	20.98
423	24.55	22.37	30.44	22.4	28.57	22.5	25.14	22.72	23.05	22.63	18.83	22.16	23.44	23.09	21.56	22.59	26.42	22.78
424	24.59	21.55	29.22	21.42	29.02	21.65	23.52	21.45	23.55	21.47	20.98	21.28	23.81	21.85	22.91	21.62	27.43	22.46
429	24.6	21.16	28.97	21.02	29.64	21.06	24.54	21.5	24.28	21.9	20.67	20.91	23.92	21.3	23.04	21.32	25.94	20.45
431	24.47	21.25	29.36	20.9	29.28	21.65	23.91	21.84	23.8	21.64	21.06	21.47	23.3	21.26	22.88	20.99	26.9	21.58
432	24.01	21.52	29.4	21.15	29.5	21.73	23.56	21.32	23.54	20.9	20.59	20.74	23.66	21.92	23.45	21.52	25.78	20.82
434	23.56	21.49	29.91	21.72	28.48	22.06	24.53	22.05	21.55	21.54	18.51	21.61	23.08	22.15	21.04	21.65	25.38	21.62
438	24.37	21.34	29.44	21.35	29.71	21.8	23.91	21.66	22.91	21.2	20.41	21.34	23.27	21.4	22.87	21.21	26.41	21.39
439	25.86	22.56	30.14	21.94	29.45	22.43	24.75	22.36	24.31	22.23	22.12	22.09	24.29	22.41	23.6	22.32	26.2	21.73
441	24.38	21.1	28.17	21.24	29.06	21.68	23.77	21.76	23.41	21.59	20.75	21.48	23.81	21.89	22.72	21.96	26.12	21.27
442	24.68	21.8	29.93	21.72	30.21	22.12	24.63	21.94	23.76	21.81	21.28	21.41	24.43	22.05	23.18	22.15	26.52	21.47
443	24.14	21.76	30.28	21.74	28	22.29	24.62	21.93	21.96	21.66	18.38	21.7	23	22.2	21.17	21.92	25.61	21.76
444	24.57	22.44	29.95	22.37	28.63	22.39	24.56	22.03	22.11	21.54	19.2	22.23	22.87	22.18	20.95	21.8	25.83	21.98
445	24.02	21.71	30.32	21.8	28.48	22.09	24.24	21.91	21.94	21.68	18.57	21.84	23.12	22.4	20.98	21.84	25.7	21.66
446	23.65	21.56	27.35	21.88	28.72	22.91	24.24	21.82	22.54	22.27	18.99	21.85	23.17	22.17	21.51	22.12	25.86	21.84
447	24.15	21.24	31.35	21.46	28.51	21.88	25.68	22.06	23.21	22.01	19.59	21.81	24.04	22.03	22.07	21.9	26.21	21.21
451	24.2	21.62	28.49	21.76	29.2	22.55	23.92	21.97	23.93	22.28	21.21	22.13	23.81	22.41	23.43	23.34	25.86	21.72
452	24.27	21.34	28.32	21.23	28.88	21.8	24.64	21.21	22.69	21.35	19.97	21.74	22.86	21.37	21.15	21.25	26.6	21.12
461	24.79	21.69	29.15	21.25	28.53	21.91	24.08	21.6	22.66	21.56	19.37	21.49	22.92	21.39	21.31	21.13	25.09	20.79
462	24.85	21.06	30.93	21.13	28.53	21.78	24.16	21.66	22.02	21.68	18.47	21.56	22.17	21.76	20.95	21.49	25.88	21.61
464	28.67	25.03	31.87	24.88	31.89	24.71	27.27	25.3	26.54	24.71	25.33	25.31	27.82	25.31	27.18	25.67	30.01	25.11
466	23.42	21.66	31.12	21.96	28.61	22.6	23.32	21.34	22.5	21.9	18.99	21.9	23.16	21.85	22.22	22.62	25.95	21.82
471	24.54	21.92	28.96	21.86	29.09	21.44	24.76	21.91	23.12	21.99	20.18	22.43	23.9	21.92	22.49	22.17	26.51	22.38
473	24.93	22.82	30.71	22.46	29.68	23.15	26.25	23.13	24.08	23.25	21.14	23.64	25.42	23.25	23.42	23.65	27.92	23.37
474	24.31	21.61	31.31	22.23	28.49	21.94	25.22	21.91	22.82	22.03	19.1	21.9	23.33	21.9	21.31	22.05	26.17	21.55
476	25.92	22.34	29.31	21.86	29.64	21.7	24.62	21.79	24.09	21.39	22.49	21.74	24.55	21.32	24.96	21.91	26.48	21.28
478	25.61	21.98	29.64	22.23	29.88	21.88	25.08	21.86	24.3	21.61	22.08	21.58	24.57	21.62	23.75	21.69	27.42	21.26
479	25.14	22.09	29.62	22.27	30.33	22.32	25.11	22.15	23.99	22.4	22.36	22.33	24.64	22.25	24.19	22.26	27.04	22.45
481	23.75	21.05	28.86	21.39	29.61	21.82	25.3	22.25	24.46	21.79	22.67	22.27	25.35	22.07	24.6	22.24	27.19	22.11
483	24.17	21.56	28.63	21.5	29	21.41	24.77	21.85	23.44	21.4	21.08	21.89	23.72	21.39	23.13	21.85	25.87	21.52
484	25.44	21.47	28.9	21.31	30.78	22.04	25.36	22.46	24.53	22.68	23	22.56	25.43	22.24	24.77	22.68	28.04	22.52
485	24.21	21.26	28.87	21.48	30.38	21.97	25.44	22.42	24.83	22.55	22.59	22.52	25.06	22.28	24.27	22.62	27.13	22.13
486	24.79	22.16	29.91	22.3	29.69	21.58	24.77	22.24	24.47	22.02	22.08	22.38	25.01	22.34	24.11	22.49	27.27	22.11
490	24.46	21.69	28.87	21.97	30.15	22.22	25.52	22.68	24.29	22.67	22.06	22.99	24.93	22.82	24.32	23.09	27.11	22.67
496	24.37	21.65	30.03	21.78	28.71	21.66	25.69	22.02	22.41	21.76	19.86	22.14	24.4	22.1	21.93	22.29	26.94	21.98
497	25.04	21.59	30.21	21.88	29.4	20.72	24.86	21.07	23.91	21.13	21.85	21.13	24.45	21.22	23.67	21.3	26.58	20.99
499	25.63	22.22	29.93	22.14	27.87	21.32	25.2	21.63	22.99	22.11	19.28	21.54	23.48	21.43	21.69	21.74	26.35	21.61
502	24.26	21.12	30.87	21.74	29.51	21.56	25.35	21.92	24.9	22.41	22.39	21.86	25.56	21.64	24.31	21.94	27.75	22.19
503	24.22	21.5	31.84	22.14	29.36	21.54	24.71	22.33	23.46	21.78	22.03	22.03	25.06	22.15	23.46	21.94	26.92	21.87
505	25.82	21.78	28.64	21.8	29.8	21.69	25.49	21.25	25.54	21.94	22.59	21.72	24.96	21.61	24.5	21.93	27.18	21.53
510	26.83	22.71	28.98	22.74	30.39	21.88	25.91	22.09	25.35	22.47	23.39	22.1	25.83	21.98	25.29	22.41	28.05	22.16
511	25.45	22.23	30.25	22.57	29.32	21.86	25	21.63	23.76	21.7	22.46	21.74	24.97	21.56	23.84	21.78	26.58	21.97
No. of RILs	TT10	Actin	TT12	Actin	TT15	Actin	TT16	Actin	TT18	Actin	TTG1	Actin	TTG2	Actin	BAN	Actin	TT19	Actin
	ct average
302	20.97	21.34	23.95	21.48	25.63	21.43	23.75	21.04	22.45	21.05	24.34	21.09	24.55	21.16	23.53	20.47	25.49	21.08
304	21.06	21.62	24.03	21.59	25.57	21.45	23.85	21.5	23.6	21.38	24.36	21.42	25.92	21.44	25.33	21.35	26.06	21.02
305	21.48	21.67	23.84	21.76	25.87	21.1	23.94	20.9	22.5	21.23	24.47	21.55	25.13	21.39	24.22	20.97	25.97	21.14
306	22.16	21.61	24.1	21.77	26.18	21.68	24	21.19	22.84	21.36	24.25	21.34	24.6	21.29	24.69	21.35	25.34	21.19
307	20.47	21.44	24.05	21.39	26.19	21.73	24.53	21.72	23.22	21.97	24.47	21.88	24.92	21.77	23.7	20.81	25.95	21.36
308	22.45	23.06	23.77	22.06	26.31	21.76	24.32	21.3	21.62	21.1	24.83	21.31	25.7	21.07	22.59	21.7	23.71	21.24
309	21.23	21.92	22.69	21.87	26.63	21.9	24.71	21.49	21.36	21.47	24.61	21.61	26.38	21.64	24.88	20.88	24.13	21.42
310	22.13	21.91	23.96	21.94	25.06	20.87	23.56	20.73	21.91	20.95	24.24	21.26	25.54	21.16	21.86	20.84	23.97	20.78
311	23.08	22.1	23.26	22.25	25.36	20.89	23.54	21.03	20.87	21.16	24.24	21.75	25.66	21.65	21.46	20.81	23.27	20.87
312	22.33	22.27	23.82	22.16	25.84	21.58	24.27	21.64	21.85	21.72	24.97	22.32	25.06	22.06	21.87	20.91	24.15	21.34
317	21.92	21.36	24	21.52	25.33	21.4	23.74	21.37	22.81	21.59	25.32	22.23	26.43	22.22	23.57	20.53	24.87	21.22
319	21.57	23.19	24.56	21.82	26.41	21.31	24.57	21.33	24.12	21.57	25.26	22.13	26.5	22.14	26.43	21.2	26.35	21.46
320	21.15	21.91	23.84	21.8	26.6	21.97	24.76	22	23.3	22.42	24.57	22.57	25.73	22.53	24.5	21.11	25.26	21.24
321	23.56	22.26	25.5	22.39	26.92	21.73	24.62	21.58	23.69	21.72	24.79	21.51	26.66	21.67	25.27	21.22	26.16	21.16
323	22.22	21.68	24.27	21.83	25.97	21.41	23.98	21.28	22.77	21.57	24.04	21.65	25.52	21.72	22.91	20.27	25.08	20.88
337	21	21.69	23.3	21.73	26.92	22.01	25.2	22.09	21.37	22	24.83	21.98	25.82	21.91	24.2	22.53	23.45	21.88
338	26.74	21.57	23.68	21.52	25.61	20.99	22.39	20.83	21.19	21.08	24.2	21.41	26.01	21.61	23.92	21.94	23.36	20.95
339	22.73	21.65	23.28	21.58	26.76	22.23	23.08	22.4	23.22	22.27	25.11	22.52	26.93	22.44	24.46	21.67	24.7	21.81
341	20.99	22	24.99	21.95	26.06	22.43	23.6	22.05	23.6	22.07	25.2	23.39	26.61	22.84	25.54	21.64	26.02	21.79
343	21.38	21.66	23.02	21.37	26.52	21.89	24.3	21.57	21.93	21.73	24.84	22.12	26.65	21.92	23.32	21.78	23.08	20.91
346	22.38	21.98	25.01	21.99	26.23	21.76	23.82	21.28	22.75	21.23	24.82	22.34	25.34	21.94	26.96	21.96	25.25	21.41
348	20.91	21.56	24.24	21.24	26.05	21.7	23.81	21.37	22.79	21.31	24.46	21.69	24.81	21.55	26.02	21.77	25.44	21.21
349	20.84	21.56	24.54	21.26	-	-	23.67	20.96	22.74	20.82	25.03	21.8	26.05	21.83	25.46	21.85	25.3	21.05
350	22.9	22.72	23.61	22.75	-	-	24.57	21.38	21.62	21.56	26.46	23.3	28.03	22.89	23.93	21.91	23.4	21.68
358	22.59	21.87	23.09	21.83	26.07	21.65	24.24	21.78	22.57	21.7	24.77	22.05	26.63	22.13	23.28	21.94	22.26	21.02
359	23.66	22.63	23.47	22.58	27.08	22.43	24.7	22.63	21.26	22.6	26.15	23.24	27.94	23.4	22.14	21.68	22.29	21.52
360	21.81	21.8	24.1	21.87	25.9	21.72	22.96	21.97	22.41	21.75	24.38	22.08	26.24	22.39	22.78	21.19	23.4	21.04
361	21.65	22.29	23.78	21.94	26.03	22.36	24.76	22.22	21.77	21.97	25.14	22.57	26.01	22.87	21.91	21.24	22.87	21.14
362	22.37	21.61	23.32	21.79	26.09	21.59	24.6	22.01	21.4	21.65	24.35	21.59	26.41	21.78	21.04	20.44	22.06	20.86
368	19.76	21.47	23.6	21.39	26.36	21.67	25.05	22.1	22.98	21.89	24.47	21.69	24.97	22.09	22.94	21.27	23.14	21.09
371	20.32	21.68	23.12	21.68	26.22	21.67	24.91	21.96	21.65	22.08	24.23	21.56	25.91	21.86	21.67	21.07	22.31	20.86
372	21.43	22.24	25.13	22.09	26.67	22.08	24.38	22.34	23.33	22.12	24.22	21.55	24.7	21.79	22.79	20.38	24.37	21.32
373	20.81	21.61	26.1	22.02	25.89	21.54	24.58	21.7	23.94	21.62	25.1	21.78	26.04	22.1	24.86	21.79	25.05	21.04
375	22.48	22.41	23.86	22.4	26.54	22.23	25.23	22.42	21.76	22.29	25.31	22.29	25.99	22.64	22.61	21.72	22.46	21.48
376	20.32	21.78	22.97	22.03	26.17	22.14	24.92	22.25	21.12	22.19	24.43	21.89	25.99	22.73	23.7	20.7	22.14	21.4
377	20.33	21.3	23.61	21.41	26.24	21.63	24.92	21.94	22.11	21.62	25.14	21.92	25.95	21.97	23.49	21.22	23.09	21.22
379	22.11	21.74	24.11	22.02	25.93	21.66	24.1	21.88	23.09	21.79	24.32	21.81	25.81	22.22	23.43	21.03	24.09	21.07
380	22.11	21.37	24.94	21.42	25.84	21.43	24.46	21.45	22.85	21.42	24.25	21.23	25.61	22	23.71	20.77	22.69	20.73
381	20.08	20.77	23.34	20.96	26.67	21.49	25.16	21.68	21.92	21.48	24.7	21.51	26.19	21.35	22.72	21.12	24.38	21.42
382	20.12	21.84	24.51	22.11	25.93	21.96	24.52	22.3	23.67	22.01	24.76	22.16	26.21	22.29	23.46	20.84	24.92	21.17
383	20.7	21.65	25.26	21.69	25.66	21.41	23.91	21.66	23.37	21.32	24.46	21.2	25.66	21.83	24.82	21.76	25.14	21.12
384	21.66	21.53	25.73	21.45	26.29	21.68	24.68	21.64	23.6	21.42	24.58	21.25	25.46	22	24.65	21.18	24.36	21.23
389	21.02	22.47	24.52	22.21	25.11	20.63	23.72	20.99	22.48	21.32	24.3	21.55	25.92	21.78	24.43	21.22	25.24	20.95
393	20.61	21.27	24.39	21.51	24.94	21.17	23.44	21.26	22.72	21.06	23.71	21.01	26.15	21.3	23.72	20.98	24.5	20.45
395	22.54	21.86	23.68	22.13	25.99	21.81	23.92	22.18	22.55	21.93	24.11	21.65	24.41	21.66	23.74	21.7	24.7	21.31
401	20.88	21.88	22.8	22.18	26.29	22.06	24.02	22.15	21.2	21.97	24.09	22.28	26	22.1	23.08	21.82	23.15	21.28
402	20.82	21.48	22.97	21.85	26.47	22.21	25.27	22.4	21.42	22.08	24.27	21.69	25.21	21.8	22.45	21.57	23.89	21.3
403	21.42	21.31	23.07	21.73	26.78	22.1	25.42	22.62	22.26	22.67	24.45	21.59	25.61	22.62	23.09	21.93	23.98	21.19
407	22.95	21.36	22.25	21.05	26.42	22.27	22.85	22.24	22.21	22.36	24.68	21.93	26.23	21.67	22.36	21.37	23.08	21.16
413	21.32	21.38	23.73	20.84	25.39	21.05	23.4	21.19	22.07	21.43	24.03	21.01	24.9	21.62	23.48	21.2	23.14	19.76
414	21.31	22.13	22.34	21.65	26.4	22.19	24.7	22.35	21.7	22.39	25.11	22.58	26.47	22.66	21.38	20.66	22.88	20.59
415	20.97	21.64	22.38	21.67	25.95	21.75	24.77	21.73	21.35	21.65	24.61	21.67	25.23	21.52	21.05	20.2	22.36	20.11
418	22.96	21.24	22.26	21.06	25.77	21.01	22.92	21.19	20.81	21.2	24.42	21.33	25.6	21.31	20.06	19.79	21.75	20.06
423	21.66	22.19	22.8	22.05	26.74	22.4	25.33	22.71	21.85	22.72	26.48	22.7	26.16	22.73	22.19	21.23	22.79	21.1
424	21.92	21.99	24.3	21.38	25.81	21.34	23.57	21.68	22.74	21.7	24.68	21.77	25.94	21.78	24.13	21.35	24.39	20.43
429	20.68	21.37	24.37	21.61	26.09	21.37	23.62	21.02	22.83	21.11	24.37	21.29	25.54	21.49	24.37	21.08	24.44	19.95
431	20.68	21.41	23.44	21.1	26.36	21.51	23.97	21.65	22.77	21.66	24.5	20.92	24.77	20.91	24.22	21.4	24.37	20.45
432	21.1	21.75	23.85	21.05	26.26	21.54	23.65	21.53	22.94	21.55	24.75	21.68	25.37	21.65	24.19	20.5	24.72	20.22
434	20.96	22	22.64	21.58	26.23	21.91	24.32	21.92	21.36	21.99	23.98	21.88	26.09	21.9	21.8	20.84	22.68	20.29
438	22.17	21.63	24.18	21.39	25.84	21.56	23.81	21.68	22.95	21.66	24.43	21.8	25.19	21.52	23.15	20.97	24.13	21.43
439	20.91	22.33	24.85	21.97	26.61	22.12	24.63	22.08	22.9	22.23	24.76	22.24	25.77	22	23.7	20.82	24.81	21.56
441	21.17	21.35	23.52	21.17	25.13	21.38	23.51	21.52	23.3	21.44	25.08	21.49	25.96	22.13	23.35	21.35	23.78	20.89
442	20.6	22.57	24.45	21.78	26.7	22.16	25.16	22.46	23.22	22.23	24.37	21.68	24.39	21.64	23.1	20.94	24.43	21.28
443	21.26	22.16	23.05	21.87	26.91	22.31	25.3	22.16	21.79	22.37	24.78	21.94	26.7	21.95	22.11	21.31	22.51	21.27
444	21.52	22.83	23.68	22.07	26.74	22.39	25.13	22.34	22	22.83	24.58	22.25	26.38	21.89	21.92	21.16	22.85	22.01
445	20.62	21.85	22.75	21.76	25.79	21.58	25.26	22.13	21.18	21.93	24.29	21.77	25.92	21.93	22.05	21.94	22	21.47
446	20.95	22.19	22.87	21.85	27.05	22.81	25.27	22.91	22.78	22.87	24.21	21.82	25.19	22.37	23.2	21.22	22.95	21.69
447	20.99	21.52	23.83	21.33	26.65	21.64	25.58	21.96	22.25	21.86	24.6	22.62	26.79	21.99	22.9	21.68	23.12	21.05
451	22.64	22.17	24.21	21.94	26.23	22.27	24.57	22.65	23.29	23.19	24.66	22.3	25.51	21.81	22.81	20.87	24.75	22.01
452	20.88	21.49	23.11	20.98	26.03	21.55	24.47	21.79	22	21.68	24.89	21.41	26	21.48	23.01	21.81	22.59	21.29
461	21.81	21.78	23.92	21.49	26.33	21.43	24.41	21.5	22.01	21.57	24.64	21.54	25.21	21.25	23.76	21.26	23.06	21.22
462	22.52	21.3	22.51	21.15	26.76	21.82	24.85	21.9	21.41	21.86	24.76	21.69	26.12	21.61	22.1	21.9	21.74	21.22
464	23.83	24.9	27.94	25.03	29.51	24.62	27.63	25.41	25.86	25.43	28.68	25.17	29.62	25.18	24.3	21.59	27.04	24.64
466	20.89	21.81	23.47	21.84	25.93	21.44	24.82	22.18	21.3	22.41	23.67	22.13	25.79	22.19	23.42	22.73	22.34	21.43
471	21.53	21.7	23.55	21.54	25.4	21.13	24.27	21.85	22.35	22.22	24.46	21.94	25.55	22.13	23.54	21.1	24.15	21.21
473	21.69	22.56	24.14	22.6	26.93	22.27	25.78	22.74	22.92	23.18	25.83	23.55	27.19	23.21	22.41	21.14	24.73	21.91
474	21.45	22.27	23.42	21.77	26.26	21.51	24.91	22.12	21.54	22.42	24.72	21.78	25.41	21.69	22.23	21.24	23.32	21.33
476	21.15	21.99	25.98	21.87	25.65	21.31	24.03	22.28	23.88	22.4	24.86	21.66	26.28	21.48	23.9	20.69	26.2	21.38
478	21.53	22.08	24.69	21.77	26.02	21.42	24.7	22.08	24.03	22.15	24.45	21.64	26.21	21.83	24.96	20.89	26.32	21.33
479	21.4	22.37	25.69	22.53	26.23	21.97	24.8	22.8	24.05	22.85	25.19	22.22	26.25	22.32	23.97	20.84	26.02	21.88
481	21.94	21.39	24.98	21.61	25.38	21.19	23.21	22.35	23.47	21.91	25.6	22.23	26.3	22.11	22.81	21.33	25.27	20.9
483	21.15	21.5	24.63	21.97	26.4	21.65	25.32	22.73	22.83	22.4	24.13	21.72	24.91	21.28	23.73	20.83	25.42	21.17
484	20.5	21.66	25.13	21.84	25.82	21.41	24.68	22.15	23.76	22.3	26.28	22.78	26.62	22.37	24.62	21.29	26.04	21.17
485	21.83	21.55	25.63	22.41	26.74	21.96	25.17	23.11	24.03	22.68	25.58	22.49	26.49	21.92	24.47	21.69	25.43	21.27
486	22.02	22.41	24.99	21.98	26.09	21.61	24.54	22.43	23.43	22.53	25.24	22.78	26.91	22.29	24.56	21.26	25.69	21.38
490	23.7	22	24.16	22.2	26.44	21.99	24.37	22.72	23.47	22.61	25.51	22.98	26.66	22.83	24.16	21.67	24.44	21.18
496	21.53	21.82	23.61	21.87	26.32	21.38	25.18	22.6	22.15	22.29	25.04	22.21	27.36	22.25	24.27	20.56	23.05	21.69
497	21.76	21.83	25.1	21.61	26.01	21.28	24.67	21.94	23.59	21.99	24.52	21.1	25.62	21.01	26	20.49	25.33	21.81
499	21.56	22.08	23.72	21.75	26.55	21.38	25.78	22.44	21.69	22.04	24.11	21.44	27.05	21.4	25.02	21.85	23.29	21.93
502	21.21	21.59	24.43	21.23	25.87	21.02	24.91	21.7	23.46	21.87	24.9	21.78	26.27	21.61	26.64	21.09	24.98	21.29
503	21.43	22.26	24.55	21.65	25.7	21.36	24.94	22.16	22.98	21.89	24.95	22.21	25.63	21.9	26.99	21.54	25.16	21.49
505	21.56	21.84	24.84	21.48	26.23	21.06	25.48	22.46	23.79	21.91	25.07	21.68	26.43	21.65	23.97	21.71	25.34	21.54
510	21.52	22.75	26.52	22.46	26.73	22.27	26.49	23.46	25.11	23.22	24.4	21.9	26.66	21.97	26.7	20.94	27.22	22.44
511	21.98	22.55	25.68	22.14	26.81	22.01	26.37	22.9	23.75	22.47	25.06	21.54	25.93	21.7	27.77	21.47	25.78	21.87
